# Supplementary material
Source: PubMed Central journal article supplement (PMC7185341)
Supplement: Supp_TableS1.pdf [file Supp_TableS1.pdf]

SUPPLEMENTARY TABLE S1. CIRCULATING  
CELL POPULATIONS

|                                            | <i>Frequency (%)</i>    |                           |                           |
|--------------------------------------------|-------------------------|---------------------------|---------------------------|
|                                            | <i>Acute on<br/>ART</i> | <i>Chronic on<br/>ART</i> | <i>Chronic no<br/>ART</i> |
| CD4 <sup>+</sup> T cells                   | 52.8                    | 43.5                      | 42.4                      |
| CD4 <sup>+</sup> Tscm                      | 2.27                    | 1.60                      | 1.52                      |
| CD8 <sup>+</sup> Tscm                      | 0.47                    | 0.72                      | 0.65                      |
| NK cells                                   | 22.3                    | 24.8                      | 19.2                      |
| CD56 <sup>-</sup> CD16 <sup>bright</sup>   | 2.41                    | 4.56                      | 7.23                      |
| CD56 <sup>dim</sup> CD16 <sup>bright</sup> | 6.41                    | 9.72                      | 6.09                      |
| CD56 <sup>dim</sup> CD16 <sup>-</sup>      | 70.3                    | 72.0                      | 69.4                      |
| CD56 <sup>bright</sup>                     | 14.5                    | 15.8                      | 10.9                      |
| CD56 <sup>bright</sup> CD16 <sup>dim</sup> | 1.61                    | 2.03                      | 1.54                      |
| CD56 <sup>bright</sup> CD16 <sup>-</sup>   | 3.53                    | 3.49                      | 2.55                      |

ART, antiretroviral therapy; NK, natural killer.
